# Supplementary material
Source: publisher figshare collection journal article supplement (https://acs.figshare.com/ndownloader/files/4732594)
Supplement: Supplementary file 1 [file 4732594]

# Supporting Information

## Evidence of thermal closing of atomic-vacancy holes in single-wall carbon nanohorns

Jin Miyawaki,<sup>\*,†</sup> Ryota Yuge,<sup>‡</sup> Takazumi Kawai,<sup>‡</sup> Masako Yudasaka,<sup>\*,†,‡</sup> Sumio Iijima<sup>†,‡,#</sup>

<sup>†</sup>*JST/SORST, c/o NEC, 34 Miyukigaoka, Tsukuba, Ibaraki 305-8501, Japan*

<sup>‡</sup>*NEC, 34 Miyukigaoka, Tsukuba, Ibaraki 305-8501, Japan*

<sup>#</sup>*Meijo University, 1-501 Shiogamaguchi, Tenpaku-ku, Nagoya 468-8502, Japan*

E-mail: [jin\\_m@frl.cl.nec.co.jp](mailto:jin_m@frl.cl.nec.co.jp), [yudasaka@frl.cl.nec.co.jp](mailto:yudasaka@frl.cl.nec.co.jp)

### Contents

Figure S1. N<sub>2</sub> adsorption isotherms at 77 K for pristine SWNHs and oxNHs before (a) and after (b) HT at 1200°C in Ar.

### N<sub>2</sub> adsorption isotherm measurements

N<sub>2</sub> adsorption isotherms for pristine SWNHs and hole-opened SWNHs (oxNHs) before and after the heat treatment (HT) at 1200°C in Ar flow were volumetrically measured at 77K using a commercial apparatus (ASAP2000, Micrometrics). The samples were vacuumed at 160°C for 1 day prior to the adsorption measurements.

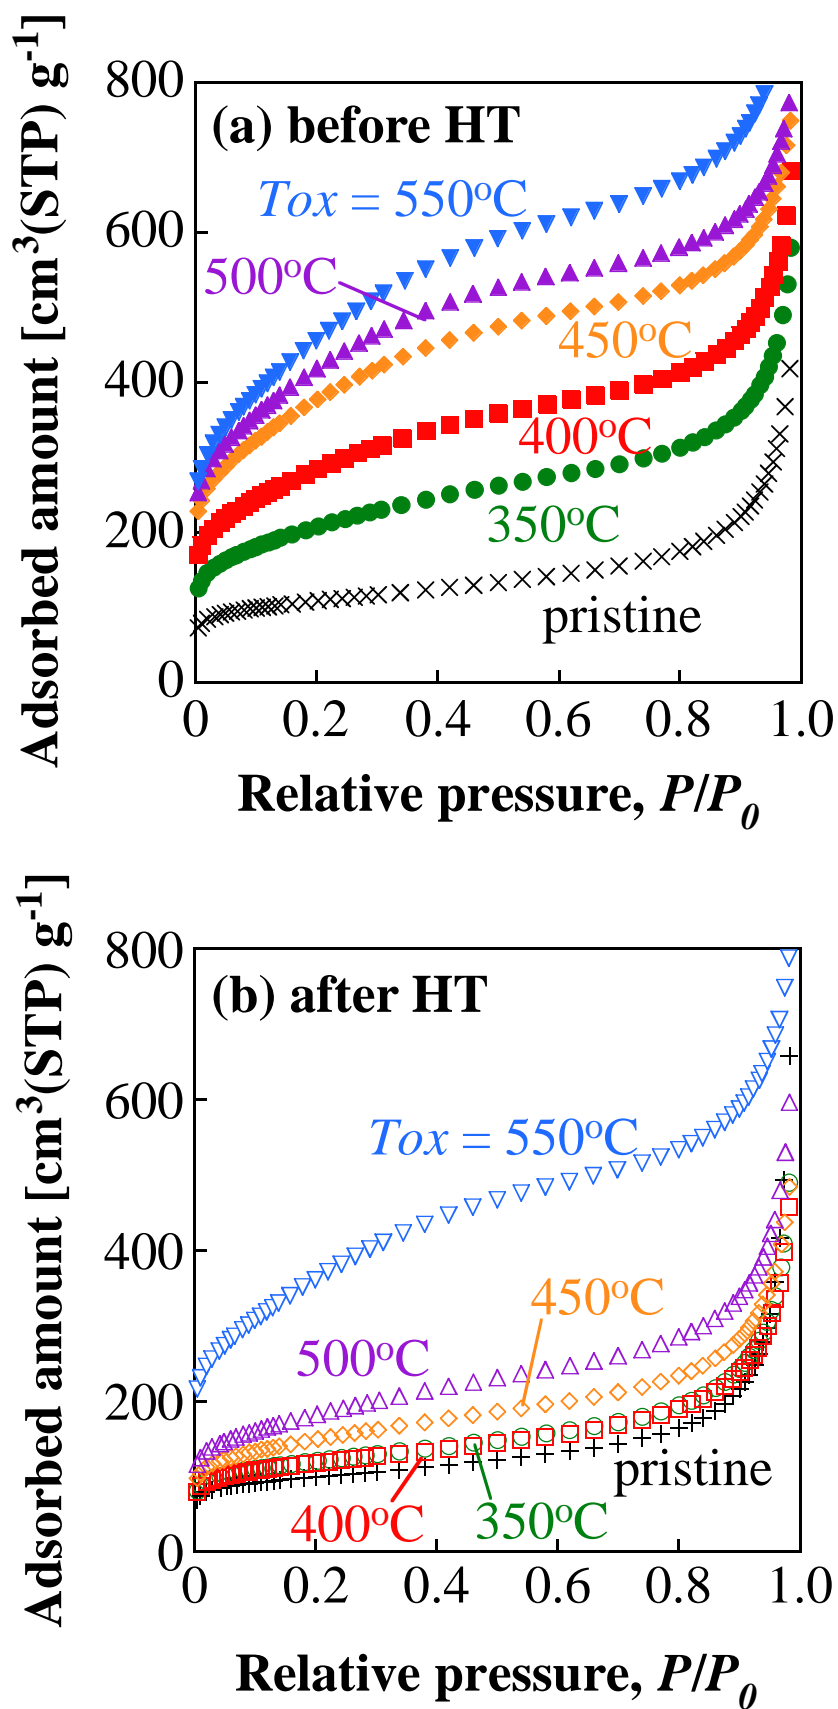

**Figure S1.**  $N_2$  adsorption isotherms at 77 K for pristine SWNHs and oxNHs before (a) and after (b) HT at  $1200^\circ\text{C}$  in Ar.
